# Supplementary material for: K-Ion intercalated V6O13 with advanced high-rate long-cycle performance as cathode for Zn-ion batteries
Source: Royal Society of Chemistry journal article supplement (doi:10.1039/d1tc04822h), 2021-11-23
Supplement: d1tc04822h1.pdf [file d1tc04822h1.pdf]

**Supporting Information:**

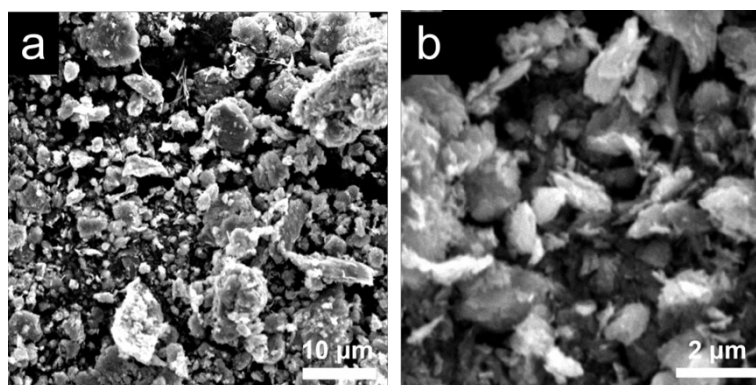

Fig. S1 The SEM images of K-V<sub>6</sub>O<sub>13</sub> at (a) 5000 and (b) 30000 magnifications.

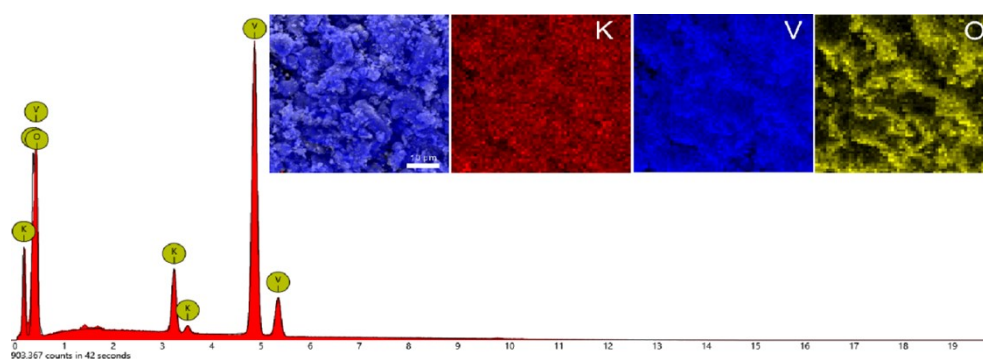

Fig. S2 The EDS of K-V<sub>6</sub>O<sub>13</sub>.

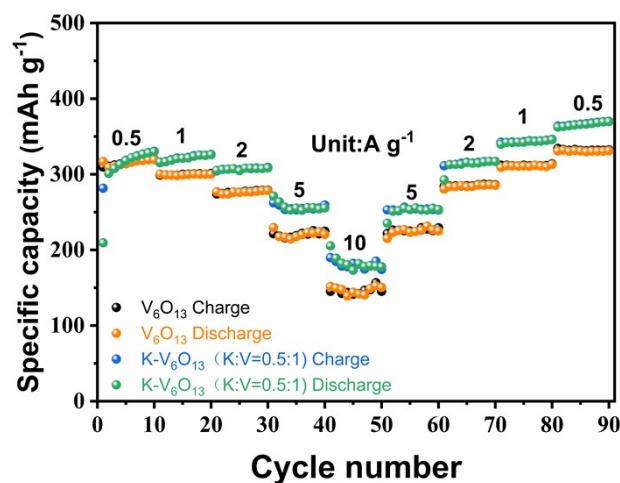

Fig. S3 Rate capability at 0.5-10 A/g over the voltage range of 0.2-1.5 V of K-V<sub>6</sub>O<sub>13</sub> (0.5:1) and pure V<sub>6</sub>O<sub>13</sub>.

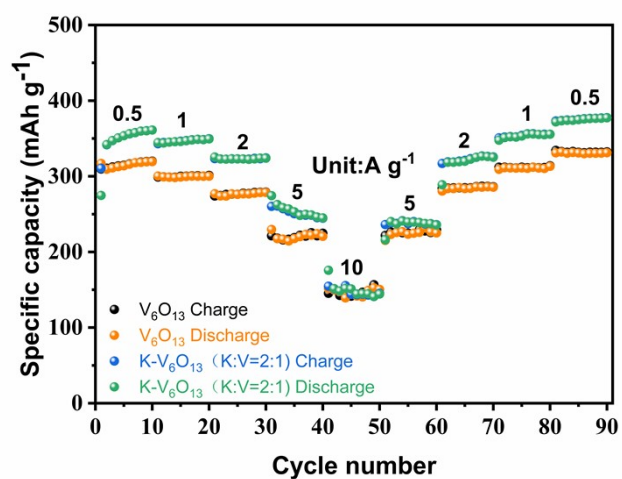

Fig. S4 Rate capability at 0.5-10 A/g over the voltage range of 0.2-1.5 V of  $K-V_6O_{13}$  (2:1) and pure  $V_6O_{13}$ .

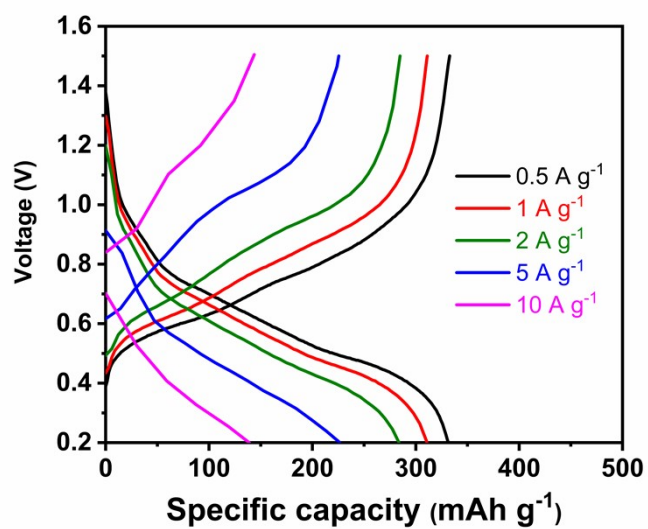

Fig. S5 Charge/discharge curves of  $V_6O_{13}$  at different rate.

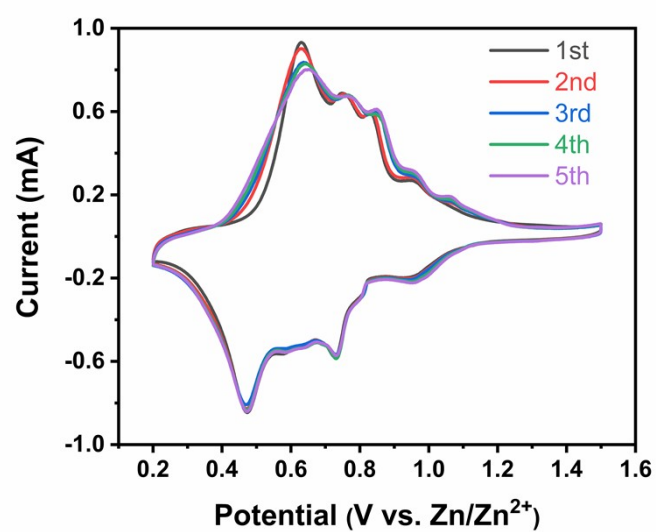

Fig. S6 Cyclic voltammetry profiles of  $\text{V}_6\text{O}_{13}$  at 0.1 mV/s.

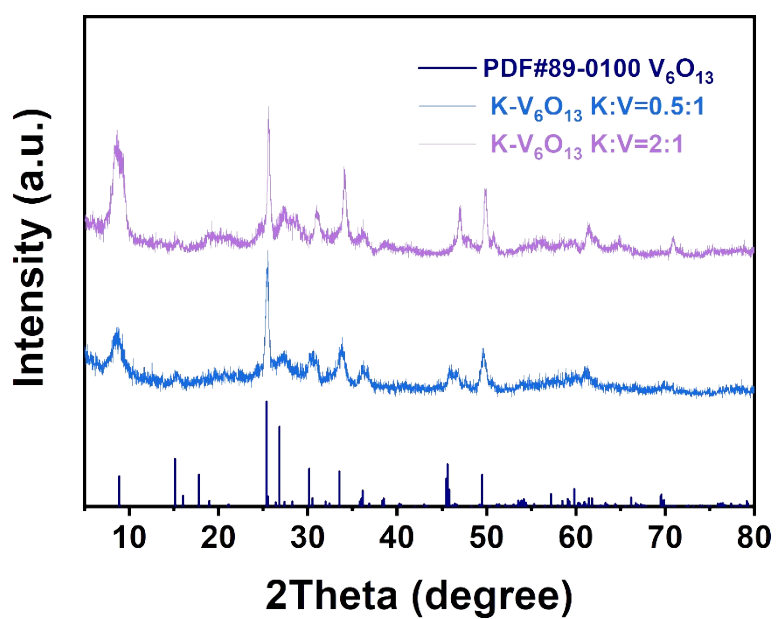

Fig. S7 XRD patterns of  $\text{K-V}_6\text{O}_{13}$  with K:V of 0.5:1 and 2:1, respectively.

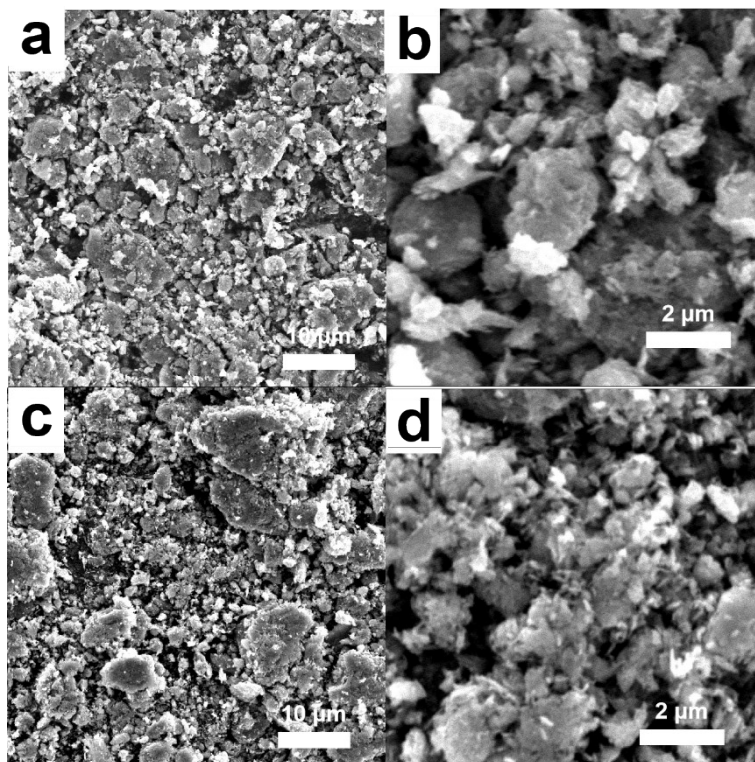

Fig. S8 SEM images of K- $V_6O_{13}$  with K:V of 0.5:1 (a-b) and 2:1 (c-d) at 5000 and 30000 magnification, respectively.

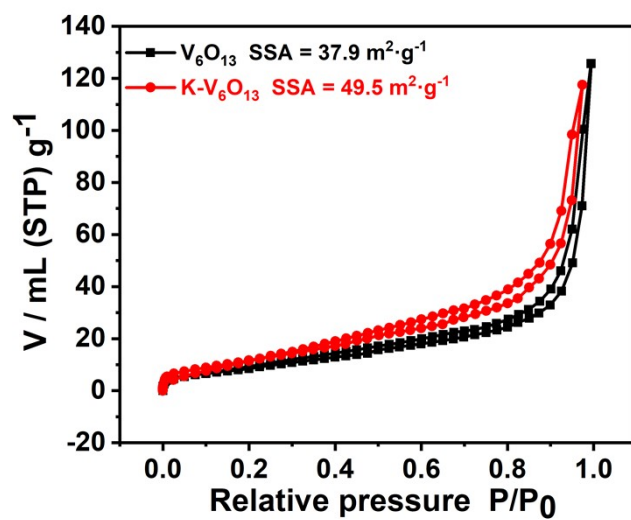

Fig. S9  $N_2$  adsorption-desorption isotherm of  $V_6O_{13}$  and K- $V_6O_{13}$ .
